# Supplementary material for: Crossing-over decision landscape in maize
Source: bioRxiv or medRxiv preprint supplement (doi:10.1101/2022.09.21.508771), 2022-09-22
Supplement: Supplementary file [file media-1.pdf]

Supplemental Table 1. Numbers of unique reads aligning to the maize genome sequence scaffold in S1-based mapping of DSB resection.

| <b>Sample</b>                       | <b>Number of unique mapping reads</b> |
|-------------------------------------|---------------------------------------|
| S1-treated B73 - replicate 1        | 6804896                               |
| S1-treated B73 - replicate 2        | 11949874                              |
| B73 input DNA                       | 14639531                              |
| Untreated B73 control               | 1788185                               |
| S1-treated B73 leaf (somatic cells) | 6766                                  |
| S1-treated <i>ameiotic1</i>         | 5168                                  |

Supplemental Table 2. Spearman correlation between samples in S1-based mapping of DSB resection.

|                                         | <b>S1-treated B73 -<br/>replicate 1</b> | <b>S1-treated B73 -<br/>replicate 2</b> | <b>Untreated B73<br/>control</b> | <b>B73 input<br/>DNA</b> |
|-----------------------------------------|-----------------------------------------|-----------------------------------------|----------------------------------|--------------------------|
| <b>S1-treated B73<br/>- replicate 1</b> | 1                                       | 0.93                                    | 0.75                             | 0.52                     |
| <b>S1-treated B73<br/>- replicate 2</b> |                                         | 1                                       | 0.77                             | 0.54                     |
| <b>Untreated B73<br/>control</b>        |                                         |                                         | 1                                | 0.47                     |
| <b>B73 input DNA</b>                    |                                         |                                         |                                  | 1                        |

Supplemental Table 3. Numbers of unique reads mapping to the maize genome in MLH3 ChIP experiments.

| <b>Genotype</b> | <b>Stage</b> | <b>Antibody</b> | <b>Numbers of unique sequence reads (mln)</b> |
|-----------------|--------------|-----------------|-----------------------------------------------|
| B73 x Mo17      | zygotene     | MLH3-C          | 29                                            |
| B73 x Mo17      | zygotene     | MLH3-N          | 29                                            |
| B73 x Mo17      | pachytene    | MLH3-C          | 64                                            |
| B73 x Mo17      | pachytene    | MLH3-N          | 64                                            |
| B73 x Mo17      | diplotene    | MLH3-C          | 27                                            |
| B73 x Mo17      | diplotene    | MLH3-N          | 47                                            |
| B73             | zygotene     | MLH3-C          | 73                                            |
| B73             | zygotene     | MLH3-N          | 22                                            |
| B73             | pachytene    | MLH3-C          | 10                                            |
| B73             | pachytene    | MLH3-N          | 18                                            |
| B73             | diplotene    | MLH3-C          | 18                                            |
| B73             | diplotene    | MLH3-N          | 40                                            |

Supplemental Table 4. Numbers of MLH3 hotspots identified in the B73 x Mo17 hybrid colocalizing in experiments using antibodies targeting the C and N termini of MLH3. Window size = 2kb;  $q = 0.05$ .

| <b>Stage</b> | <b>Peak No. for<br/>MLH3-C</b> | <b>Peak No. for<br/>MLH3-N</b> | <b>No. of overlapping<br/>peaks</b> | <b>% of overlapping<br/>peaks</b> |
|--------------|--------------------------------|--------------------------------|-------------------------------------|-----------------------------------|
| Zygotene     | 61                             | 690                            | 48                                  | 78.7                              |
| Pachytene    | 1115                           | 1066                           | 673                                 | 63.1                              |
| Diplotene    | 6945                           | 63426                          | 5503                                | 79.2                              |

Supplemental Table 5. Correlation between MLH3 patterns generated using antibodies targeting the C and N termini of MLH3 at different prophase I substages in the B73 x Mo17 hybrid. Table shows numbers of MLH3 peaks colocalizing in non-overlapping 2 kb windows distributed genome wide.  $q = 0.05$ .

| Stage     | Pattern 1 |          | vs. | Pattern 2 |          | No. of overlapping peaks | % of overlapping peaks |          |
|-----------|-----------|----------|-----|-----------|----------|--------------------------|------------------------|----------|
|           | Antibody  | Peak No. |     | Stage     | Antibody |                          |                        | Peak No. |
| zygotene  | MLH3-C    | 61       |     | pachytene | MLH3-C   | 1115                     | 9                      | 14.8     |
| zygotene  | MLH3-C    | 61       |     | diplotene | MLH3-C   | 6945                     | 17                     | 27.9     |
| pachytene | MLH3-C    | 1115     |     | diplotene | MLH3-C   | 6945                     | 974                    | 87.4     |
| zygotene  | MLH3-N    | 690      |     | pachytene | MLH3-N   | 1066                     | 14                     | 2.0      |
| zygotene  | MLH3-N    | 690      |     | diplotene | MLH3-N   | 63426                    | 92                     | 13.3     |
| pachytene | MLH3-N    | 1066     |     | diplotene | MLH3-N   | 63426                    | 963                    | 90.3     |

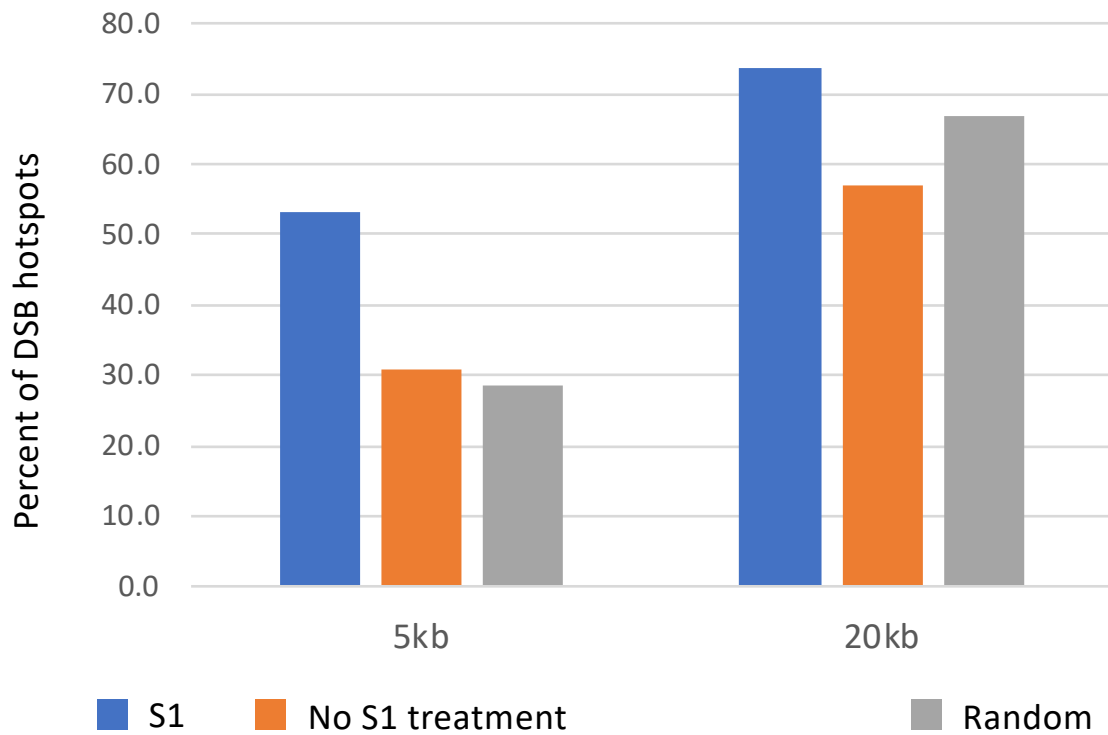

**Supplemental Figure 1.** Percent of DSB hotspots identified using RAD51 ChIP located within 5kb and 20kb from S1 resection sites 500bp to 2000bp in length.

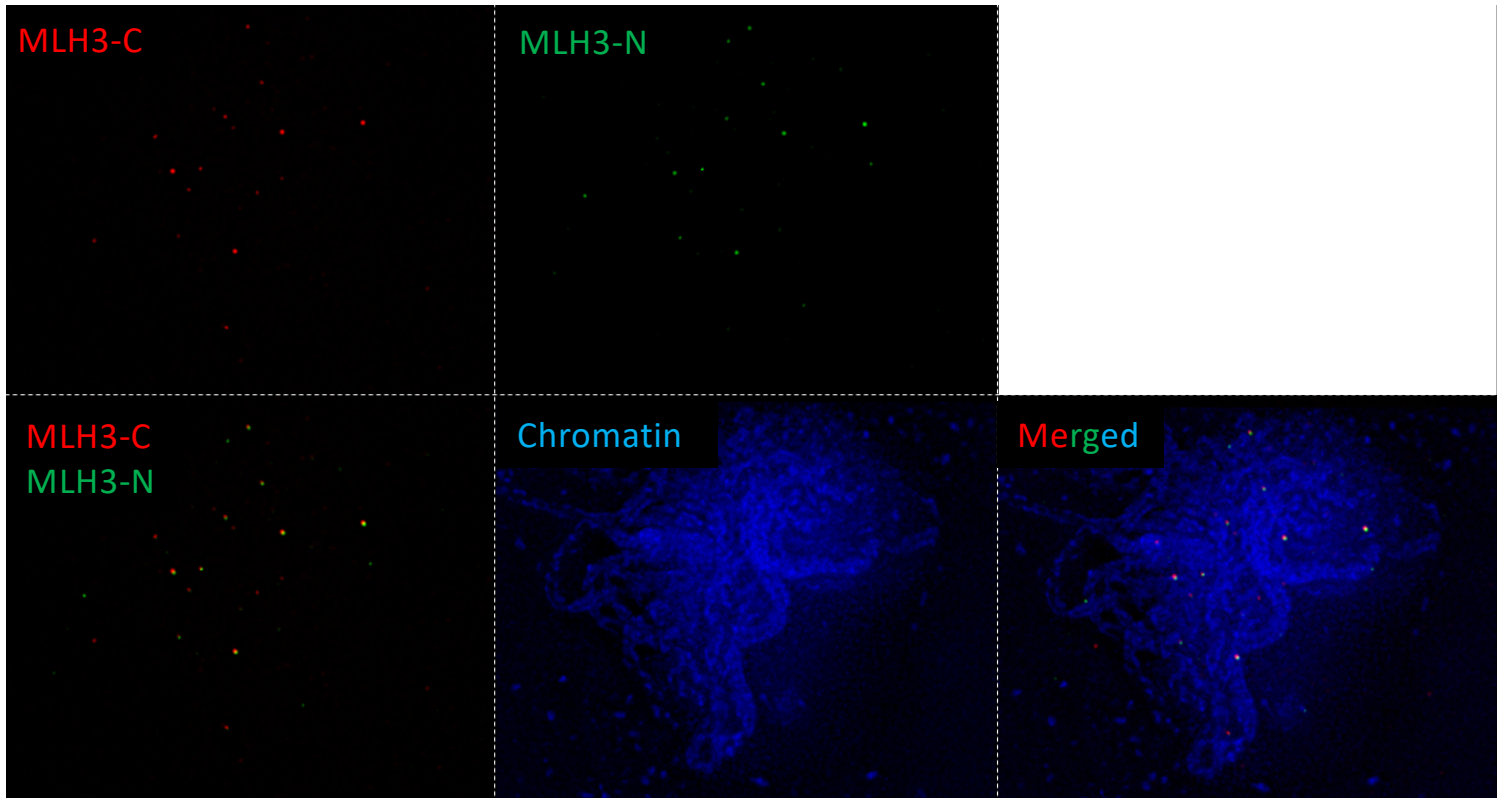

**Supplementary Figure 2.** Co-immunolabeling of MLH3-C and MLH3-N antibodies pachytene chromosomes in the B73 x Mo17 hybrid.

A

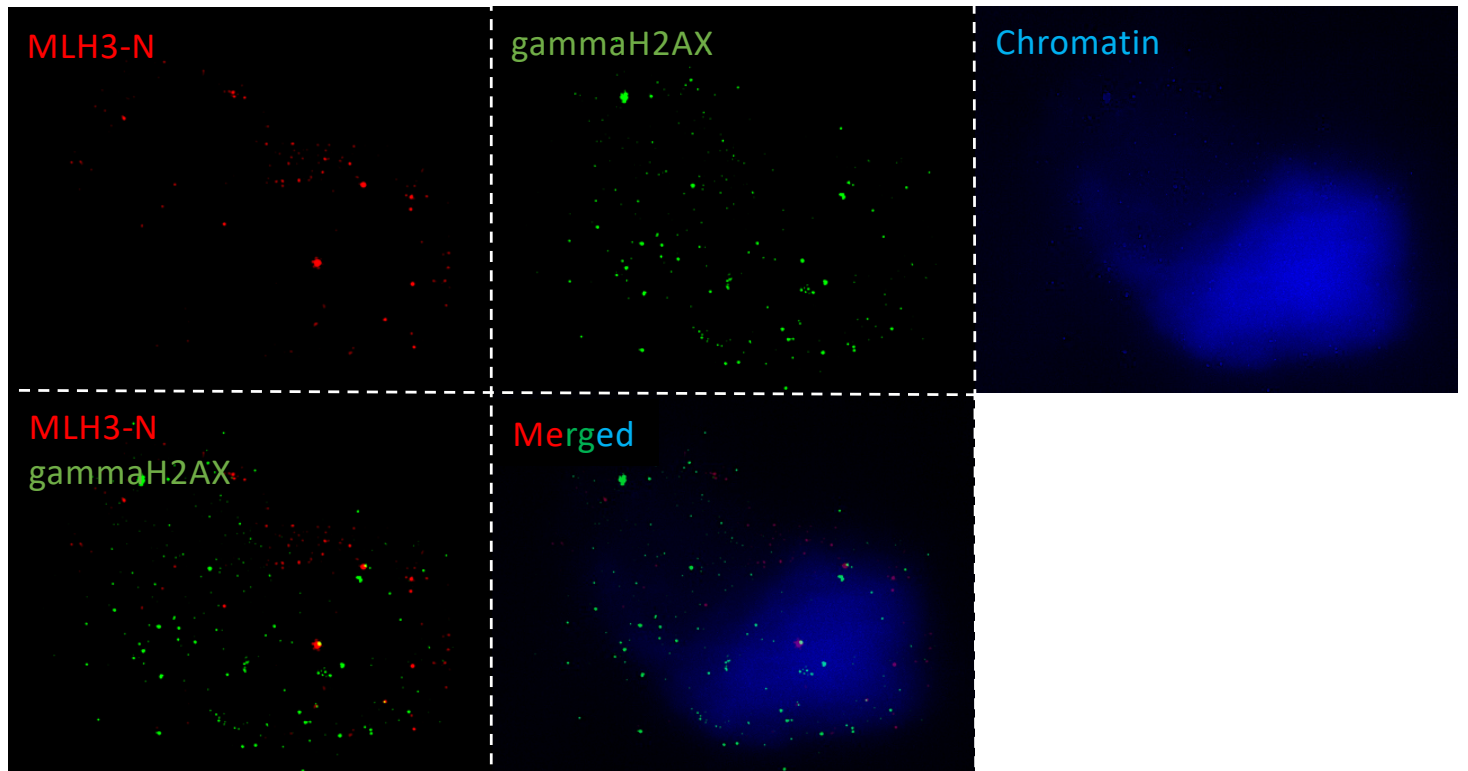

B

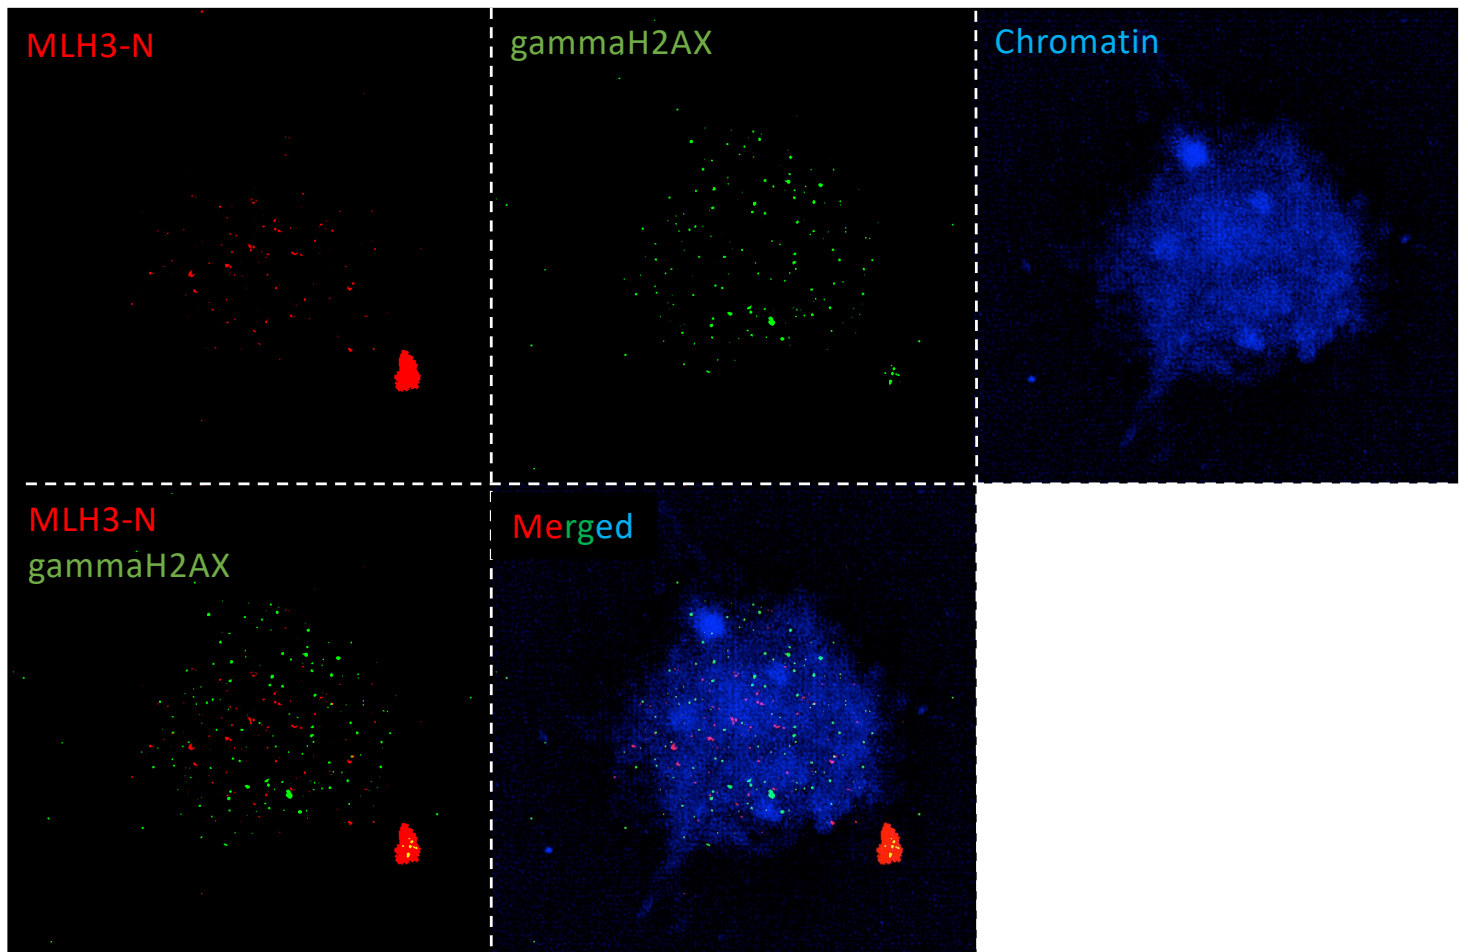

**Supplementary Figure 3.** Co-localization of MLH3-N foci with early recombination markers gammaH2AX (A) and RAD51 (B).



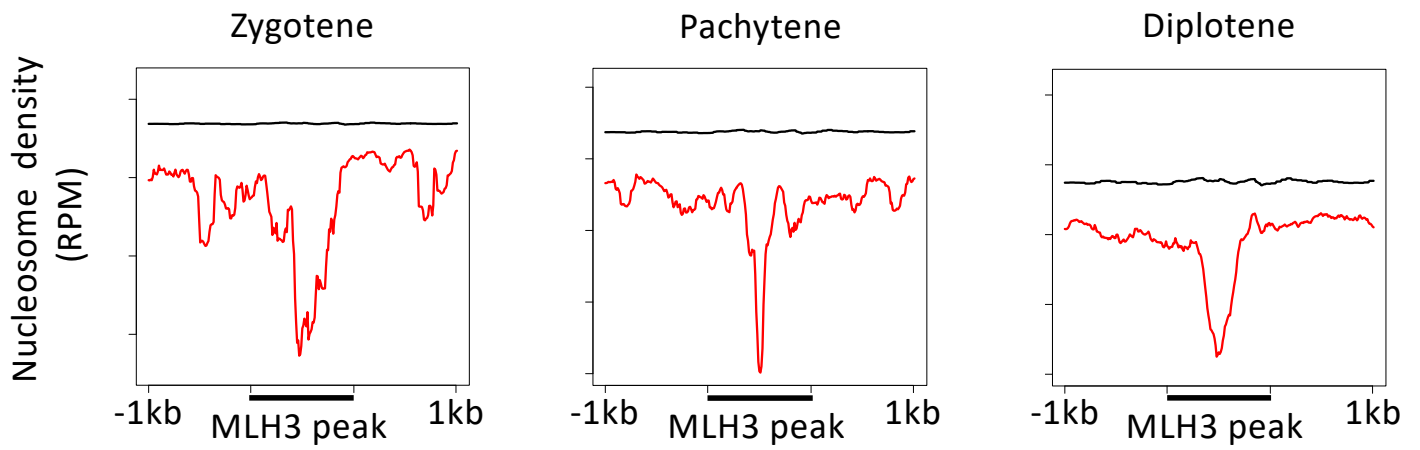

**Supplementary Figure 4.** Nucleosome occupancy measured by monococcal nuclease digestion at the sites of MLH3 hotspots detected at different substages of meiosis I in the maize inbred B73.
